# Supplementary material
Source: PubMed Central journal article supplement (PMC10465424)
Supplement: 11606_2023_8101_MOESM1_ESM.pdf [file 11606_2023_8101_MOESM1_ESM.pdf]

**Appendix A1**

| <b>Codes for Percutaneous<br/>Coronary Intervention</b> | <b>Codes for Cardiac<br/>Catheterization</b> | <b>Codes for Knee<br/>Replacements</b> |
|---------------------------------------------------------|----------------------------------------------|----------------------------------------|
| 92920                                                   | 0523T                                        | 0396T                                  |
| 92921                                                   | 93452                                        | 27420                                  |
| 92924                                                   | 93453                                        | 27422                                  |
| 92925                                                   | 93454                                        | 27424                                  |
| 92928                                                   | 93455                                        | 27427                                  |
| 92929                                                   | 93456                                        | 27428                                  |
| 92933                                                   | 93457                                        | 27429                                  |
| 92934                                                   | 93458                                        | 27437                                  |
| 92937                                                   | 93459                                        | 27438                                  |
| 92938                                                   | 93460                                        | 27486                                  |
| 92941                                                   | 93461                                        | 27487                                  |
| 92943                                                   |                                              | G0428                                  |
| 92944                                                   |                                              | 27440                                  |
| 92973                                                   |                                              | 27441                                  |
|                                                         |                                              | 27442                                  |
|                                                         |                                              | 27443                                  |
|                                                         |                                              | 27445                                  |
|                                                         |                                              | 27446                                  |
|                                                         |                                              | 27447                                  |
